# Supplementary material
Source: PubMed Central journal article supplement (PMC2377015)
Supplement: NIHMS44514-supplement-Supplementary_.pdf [file NIHMS44514-supplement-Supplementary_.pdf]

Supplementary information for:

GH Perry, NJ Dominy, KG Claw, AS Lee, H Fiegler, R Redon, J Werner, FA Villanea, JL Mountain, R Misra, NP Carter, C Lee, and AC Stone

Diet and the evolution of human amylase gene copy number variation

**Supplementary Figure 1.** qPCR and aCGH population-level *AMY1* copy number data. **(a)** qPCR-estimated *AMY1* diploid copy number frequency distributions for each of the populations in this study, including 3 populations with high-starch diets (gray bars) and 4 populations with traditionally low-starch diets (red bars). **(b)** Frequency distributions of aCGH relative intensity log<sub>2</sub> ratios from *AMY1*-mapped clones Chr1tp-6D2 and Chr1tp-30C7 from aCGH experiments for the low-starch Yakut and the 4 high-starch HapMap populations. The Yakut mean log<sub>2</sub> ratios for both clones are lower than those for every HapMap population. The greatest differences for the log<sub>2</sub> ratio comparisons are with the Asian populations, who have the closest geographic similarity to the Yakut (Siberia). **(c)** qPCR-estimated diploid *AMY1* gene copy numbers for the Japanese and Yakut populations are significantly positively correlated with relatively intensity log<sub>2</sub> ratios for *AMY1*-mapped clones Chr1tp-6D2 and Chr1tp-30C7 from aCGH experiments. The same reference DNA sample (NA10851) was used for all aCGH experiments.

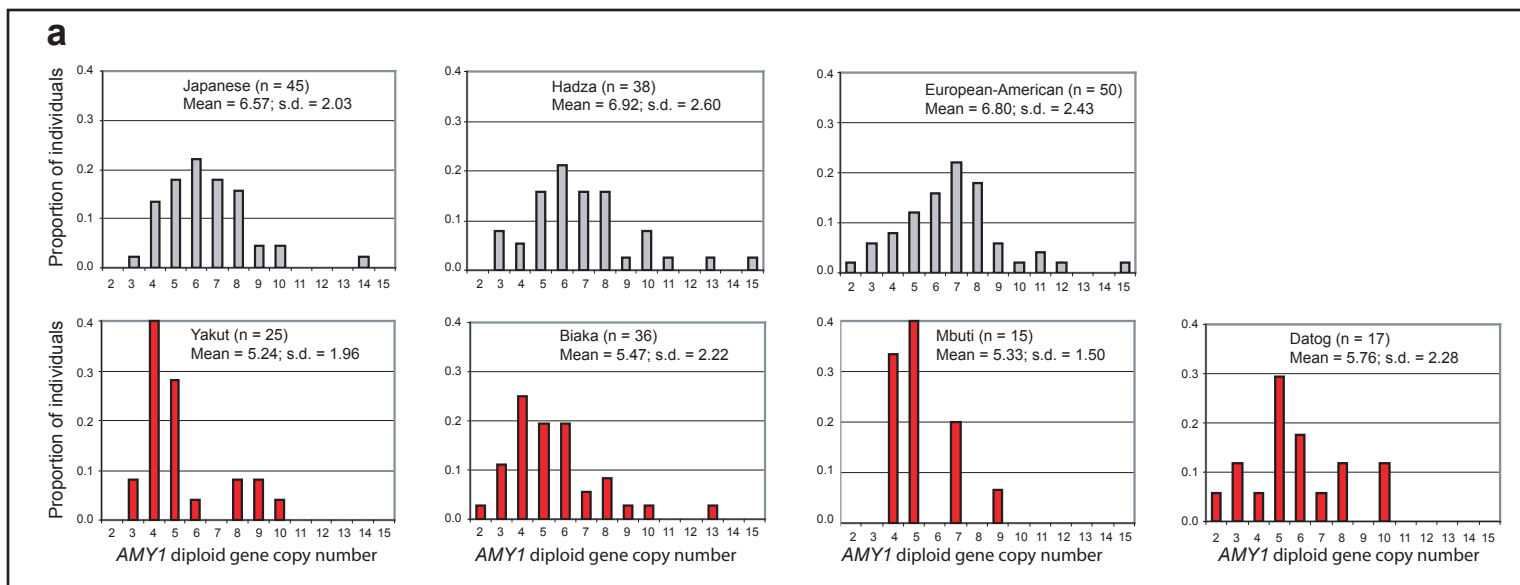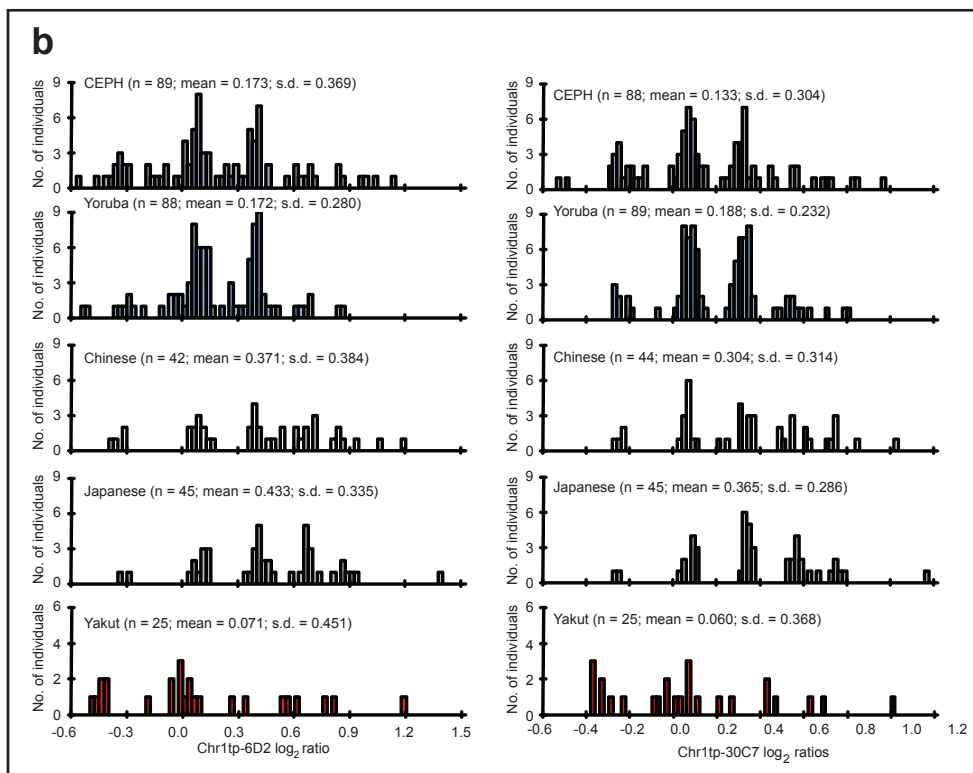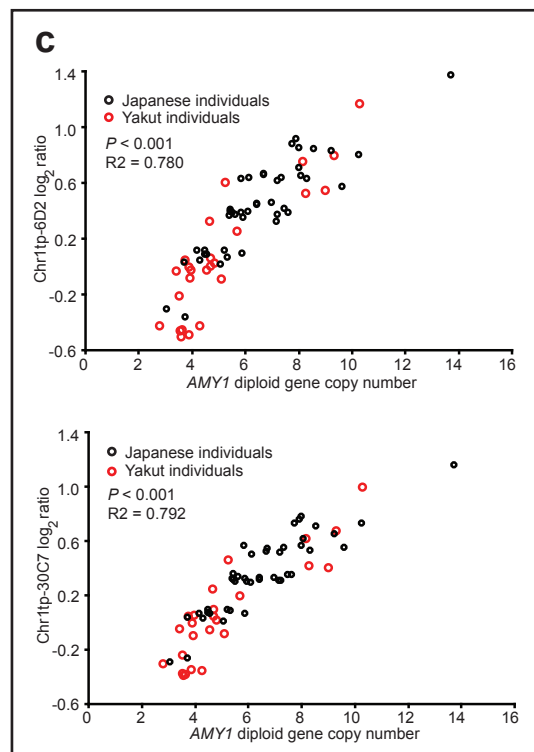

**Supplementary Figure 2.** Genome-wide analysis of Japanese-Yakut copy number differentiation. We conducted a least squares regression analysis on the distribution of Japanese and Yakut mean log<sub>2</sub> ratios from aCGH experiments for all autosomal clones on the WGTP array platform found to be copy number variable in at least one individual from both populations (see Fig. 4b). The log<sub>2</sub> ratios are all relative to a single male reference individual (NA10851; European-American/ CEPH). If there is no difference in mean copy number between the two populations at a particular locus, then the population mean log<sub>2</sub> ratios will be similar, even if the values are dissimilar from 0 (i.e., the reference individual may not have a copy number that reflects the general population mean at any particular locus). There is a positive relationship between Japanese and Yakut mean log<sub>2</sub> ratios with slope ~1 ( $P < 0.001$ ;  $R^2 = 0.65$ ; Yakut mean log<sub>2</sub> =  $-0.0134 + 0.895$  Japanese mean log<sub>2</sub>), as would be expected if the two populations have roughly similar levels of genome-wide differentiation with the population from which the reference individual was sampled. Copy number variants within clones with mean log<sub>2</sub> ratios that significantly deviate from this distribution may have been subject to relatively unusual evolutionary pressures in one or both of the populations. Therefore, we evaluated the unusualness of the *AMY1*-mapped clones by comparing the residuals for these clones against the distribution of residuals from all copy number variable clones in the genome. This figure depicts the frequency distribution of the residuals (bins = 0.01) for the 474 autosomal copy number variable clones from the least squares regression analysis. The *AMY1*-mapped clones Chr1tp-6D2 (depicted in red) and Chr1tp-30C7 (depicted in blue) have residuals 3.5 s.d. ( $P < 0.001$ ) and 2.9 s.d. ( $P < 0.01$ ) from the mean, respectively.

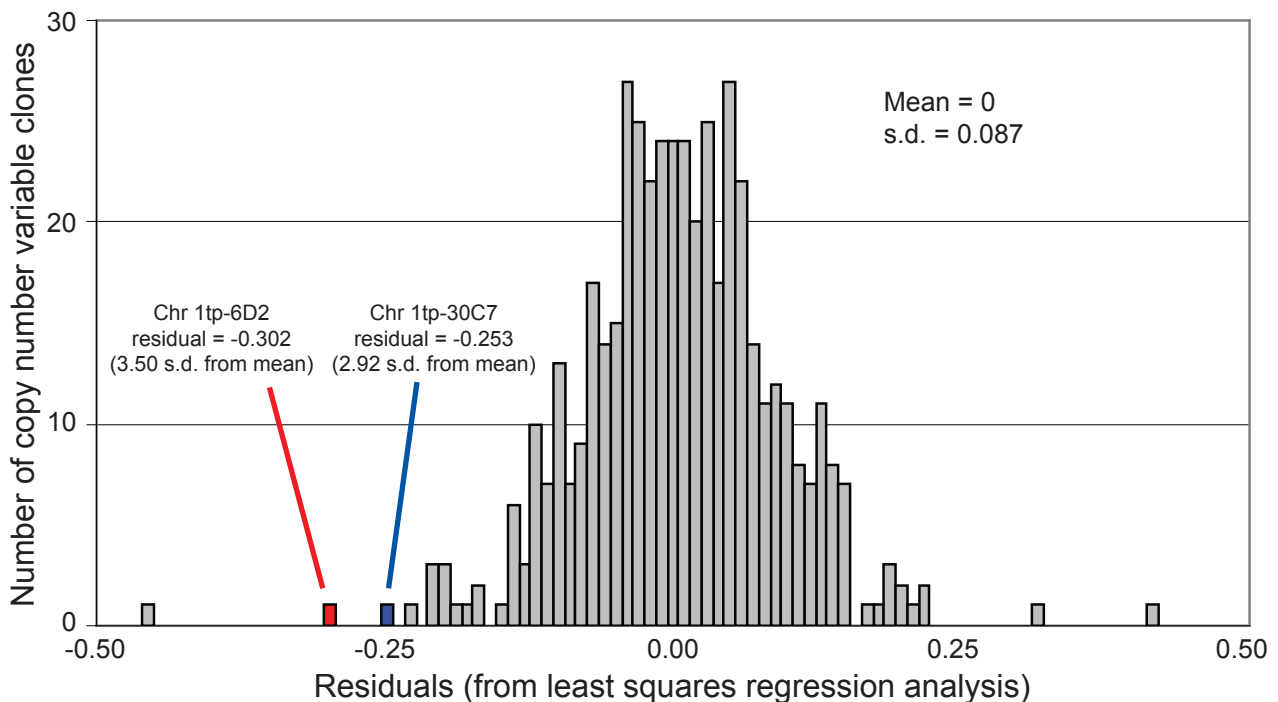

**Supplementary Figure 3.** Comparison of Japanese-Yakut population differentiation for *AMY1* and 783 genome-wide microsatellites. To make the microsatellite data (for which allele-specific data are available) and *AMY1* copy number data (for which we have only “combined” diploid information for each individual in our population samples, due to current technological limitations) more generally comparable, we combined the allele-specific microsatellite genotypes into one value for each individual for each microsatellite. For example, if one individual has alleles of 188 and 180 bp, the combined value = 368. These combined values were used in the analysis. For each microsatellite locus and the *AMY1*-mapped clones from the WGTP aCGH experiments, we computed the absolute difference in population mean values, scaled to within-population standard deviation (weighted by population size). Based on this statistic, the level of population differentiation at the *AMY1* locus exceeds that for >97% of the 783 microsatellites.

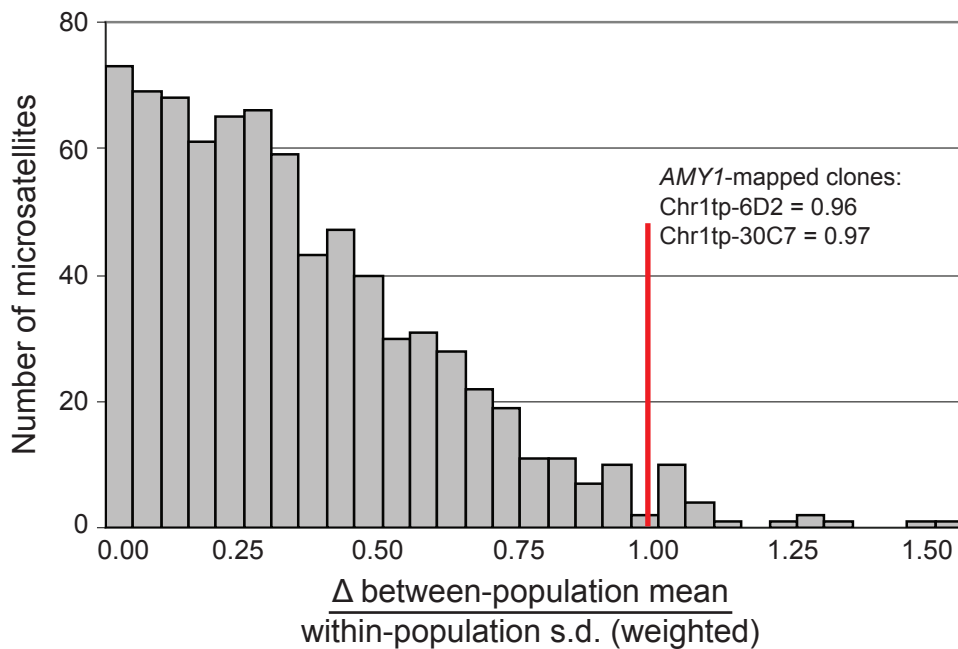

**Supplementary Figure 4. *AMY1* copy number in chimpanzees and bonobos. (a)** There is no evidence for *AMY1* copy number variation among chimpanzees; all 15 individuals examined with qPCR are estimated to have two diploid *AMY1* copies. All chimpanzee individuals were from the western chimpanzee subspecies (*Pan troglodytes verus*). Bonobos are estimated to have four diploid copies. Error bars indicate 2 s.d. **(b)** Fiber FISH confirms the qPCR estimate of four diploid *AMY1* copies for bonobo individual Ppa16 (PR00251). The red probe (~10 kb) encompasses the entire *AMY1* gene, and the green probe (~8 kb) is directly upstream of the *AMY1* gene (see Methods).

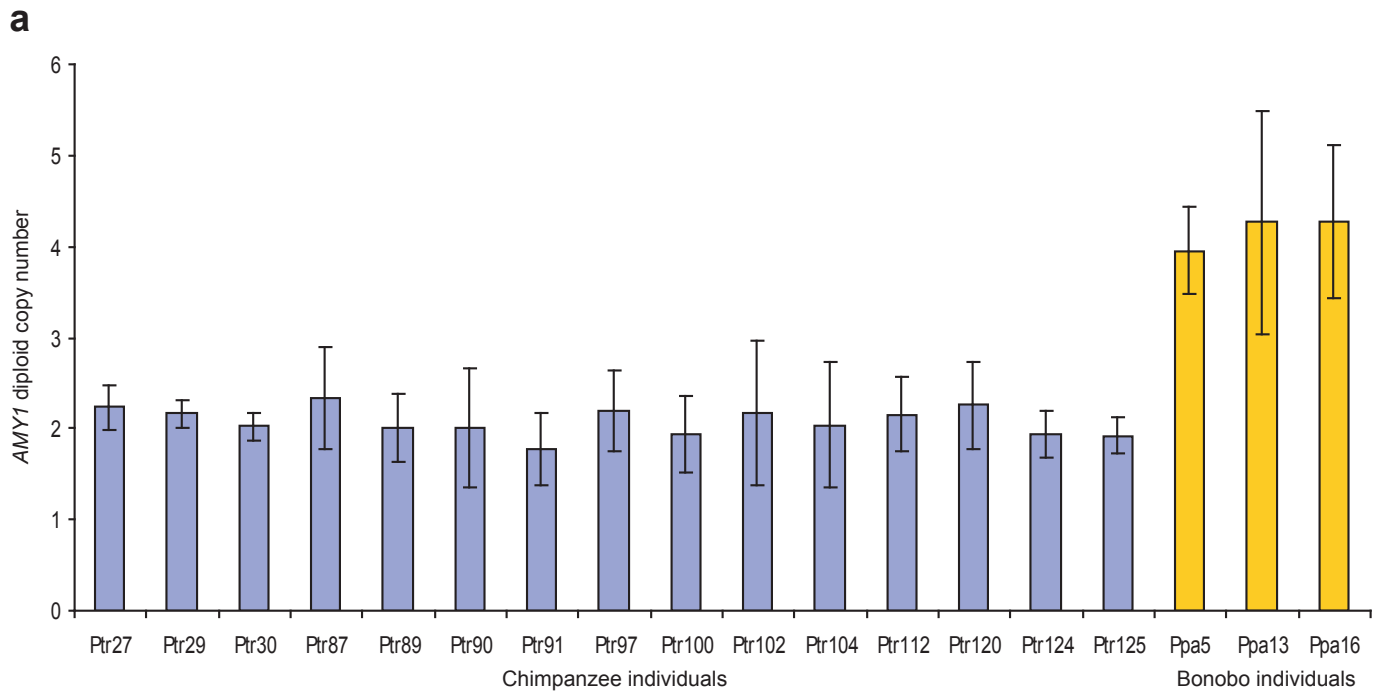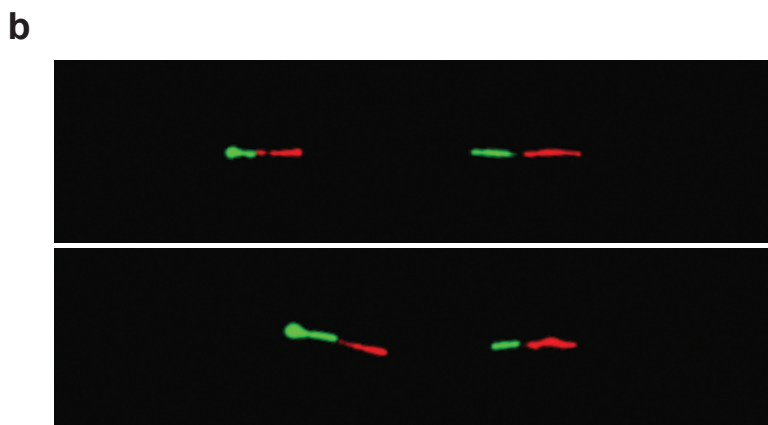

**Supplementary Figure 5.** Evolution of the primate amylase gene family. **(a)** Phylogenetic reconstruction using the Neighbor-Joining method for primate amylase gene sequences (introns and third positions of exons; 8,005 total sites) from human, chimpanzee, bonobo, gorilla, rhesus macaque, Angolan colobus monkey (*Colobus angolensis*), and common woolly monkey (*Lagothrix lagotricha*). Bootstrap support (10,000 replications) was 99% or 100% for all branches except for the human-gorilla *AMY1* grouping (92%) and the hominoid *AMY1-AMY2A* grouping (54%). Lineage-specific ratios of nonsynonymous substitutions (N) per site to synonymous substitutions (S) per site (dN/dS) estimated from coding regions are given above each branch.  $dN/dS = \infty$  reflects nonzero N and zero S on that lineage (in both such cases,  $N = 1$  and  $S = 0$ ). For most lineages  $dN/dS < 1$ , suggesting an overall history of functional constraint for the primate amylase gene family. However, we identified two frameshift insertions (1 bp each) in exon 7 of bonobo *AMY1* (asterisk; see below), a possible indication of pseudogene status. For this branch  $dN/dS \sim 1$  ( $N = 5.1$ ,  $S = 1.4$ ), which is consistent with neutral evolution. **(b)** Nucleotide sequences from human, chimpanzee, bonobo, and gorilla for a selected portion of *AMY1* exon 3. The bonobo sequence exhibits a G/T polymorphism (potentially representing a paralogous sequence variant; see Supplementary Fig. 4) in this exon which is inferred to result in a stop codon in the amino acid sequence for some bonobo *AMY1* transcripts. **(c)** Nucleotide sequences from human, chimpanzee, bonobo, and gorilla for a selected portion of *AMY1* intron 6 and exon 7. There are two single bp insertions within exon 7 of the bonobo sequence, which are inferred to disrupt (by frameshift) all downstream *AMY1* coding sequence.

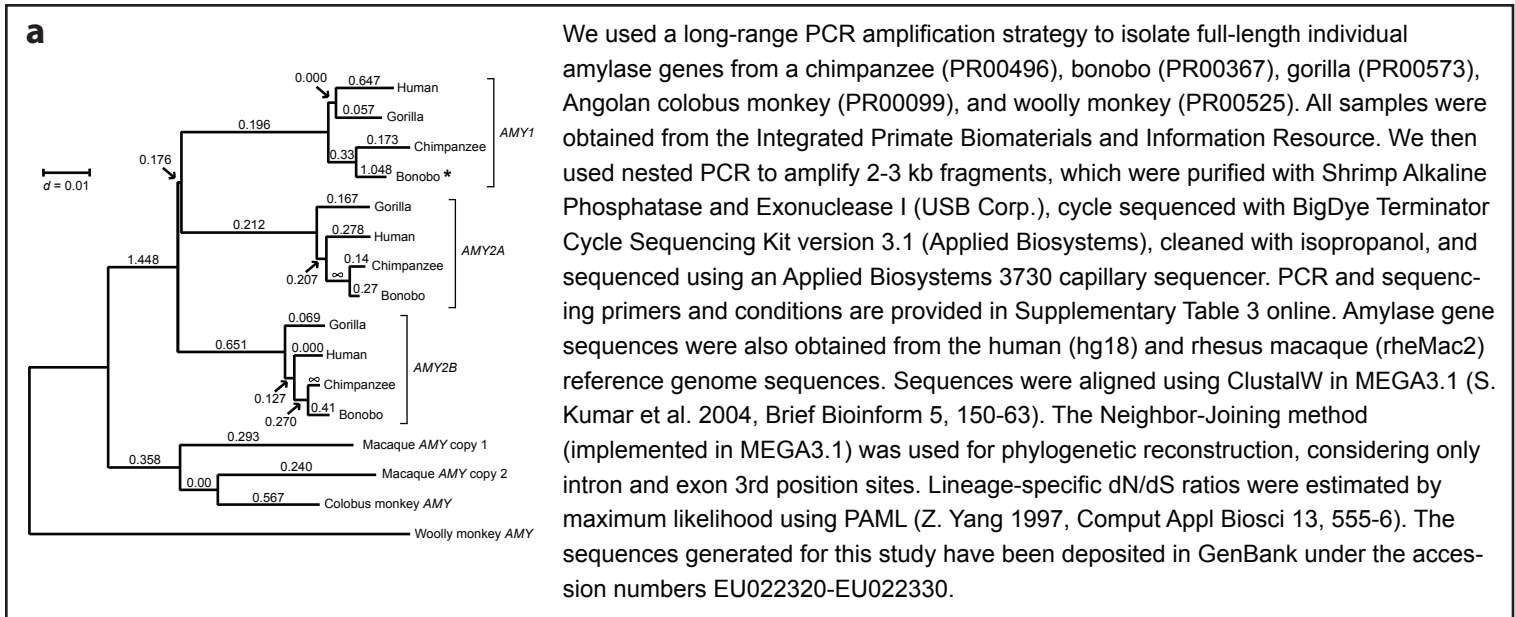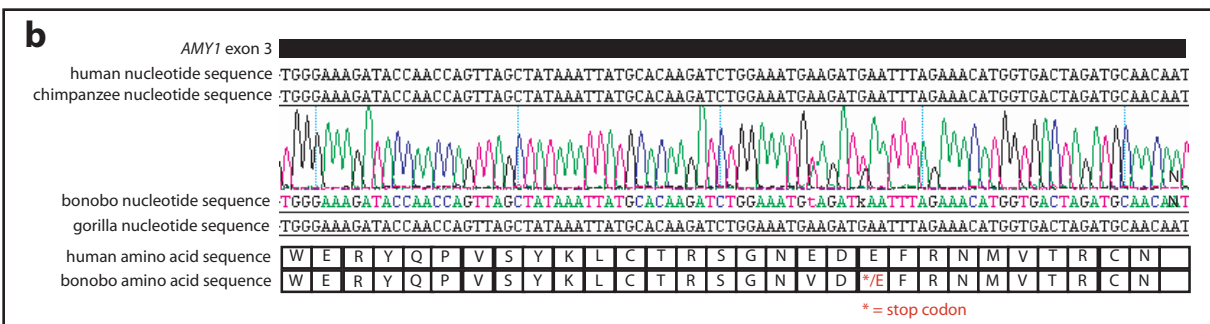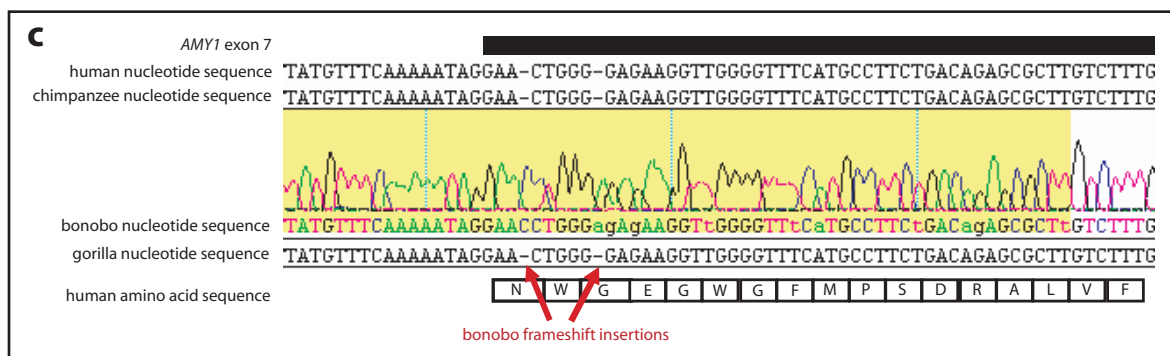

**Supplementary Table 1. qPCR, protein quantification, and aCGH data for high- and low-starch population samples.**

| Population        | Sample | Starch level (high/low) | Diploid <i>AMY1</i> copies (qPCR) | Standard Deviaion | Diploid <i>AMY1</i> copies (integer) | <i>AMY1</i> protein mg/mL | Chr1tp-6D2 log2 ratio | Chr1tp-30C7 log2 ratio |
|-------------------|--------|-------------------------|-----------------------------------|-------------------|--------------------------------------|---------------------------|-----------------------|------------------------|
| European-American | EUR001 | High                    | 7.30                              | 0.50              | 7                                    | 2.83                      |                       |                        |
| European-American | EUR002 | High                    | 4.26                              | 0.49              | 4                                    | 1.65                      |                       |                        |
| European-American | EUR003 | High                    | 7.10                              | 0.93              | 7                                    | 3.85                      |                       |                        |
| European-American | EUR004 | High                    | 4.91                              | 0.21              | 5                                    | 1.09                      |                       |                        |
| European-American | EUR005 | High                    | 8.15                              | 0.78              | 8                                    | 1.63                      |                       |                        |
| European-American | EUR006 | High                    | 11.73                             | 0.55              | 12                                   | 5.17                      |                       |                        |
| European-American | EUR007 | High                    | 6.50                              | 0.38              | 6                                    | 3.24                      |                       |                        |
| European-American | EUR008 | High                    | 8.44                              | 0.70              | 8                                    | 2.80                      |                       |                        |
| European-American | EUR009 | High                    | 5.73                              | 0.39              | 6                                    | 3.30                      |                       |                        |
| European-American | EUR010 | High                    | 8.36                              | 0.93              | 8                                    | 4.28                      |                       |                        |
| European-American | EUR011 | High                    | 7.63                              | 0.45              | 8                                    | 2.91                      |                       |                        |
| European-American | EUR012 | High                    | 6.89                              | 0.51              | 7                                    | 2.89                      |                       |                        |
| European-American | EUR013 | High                    | 11.20                             | 0.80              | 11                                   | 3.76                      |                       |                        |
| European-American | EUR014 | High                    | 6.18                              | 0.31              | 6                                    | 2.65                      |                       |                        |
| European-American | EUR015 | High                    | 7.94                              | 1.12              | 8                                    | 1.70                      |                       |                        |
| European-American | EUR016 | High                    | 5.56                              | 0.76              | 6                                    | 3.20                      |                       |                        |
| European-American | EUR017 | High                    | 8.53                              | 0.75              | 9                                    | 2.96                      |                       |                        |
| European-American | EUR018 | High                    | 9.67                              | 0.56              | 10                                   | 4.87                      |                       |                        |
| European-American | EUR019 | High                    | 7.46                              | 1.00              | 7                                    | 4.00                      |                       |                        |
| European-American | EUR020 | High                    | 3.41                              | 0.56              | 3                                    | 0.93                      |                       |                        |
| European-American | EUR021 | High                    | 2.21                              | 0.50              | 2                                    | 0.22                      |                       |                        |
| European-American | EUR022 | High                    | 5.27                              | 0.54              | 5                                    | 1.65                      |                       |                        |
| European-American | EUR023 | High                    | 9.14                              | 0.64              | 9                                    | 2.72                      |                       |                        |
| European-American | EUR024 | High                    | 7.64                              | 0.22              | 8                                    | 2.46                      |                       |                        |
| European-American | EUR025 | High                    | 5.87                              | 0.36              | 6                                    | 1.35                      |                       |                        |
| European-American | EUR026 | High                    | 2.61                              | 0.20              | 3                                    | 0.22                      |                       |                        |
| European-American | EUR027 | High                    | 5.23                              | 0.59              | 5                                    | 1.37                      |                       |                        |
| European-American | EUR028 | High                    | 4.58                              | 0.49              | 5                                    | 2.33                      |                       |                        |
| European-American | EUR029 | High                    | 6.62                              | 1.02              | 7                                    | 3.37                      |                       |                        |
| European-American | EUR030 | High                    | 5.38                              | 0.59              | 5                                    | 2.24                      |                       |                        |
| European-American | EUR031 | High                    | 8.55                              | 0.64              | 9                                    | 3.72                      |                       |                        |
| European-American | EUR032 | High                    | 4.66                              | 0.78              | 5                                    | 3.85                      |                       |                        |
| European-American | EUR033 | High                    | 8.19                              | 0.97              | 8                                    | 2.50                      |                       |                        |
| European-American | EUR034 | High                    | 6.56                              | 0.62              | 7                                    | 5.67                      |                       |                        |
| European-American | EUR035 | High                    | 6.26                              | 0.87              | 6                                    | 4.61                      |                       |                        |
| European-American | EUR036 | High                    | 7.16                              | 0.73              | 7                                    | 3.41                      |                       |                        |
| European-American | EUR037 | High                    | 6.30                              | 1.24              | 6                                    | 5.09                      |                       |                        |
| European-American | EUR038 | High                    | 4.30                              | 0.80              | 4                                    | 2.15                      |                       |                        |

**Supplementary Table 1. qPCR, protein quantification, and aCGH data for high- and low-starch population samples.**

| European-American | EUR039 | High                       | 5.56                                 | 0.54                 | 6                                       | 4.33                  |                          |                           |
|-------------------|--------|----------------------------|--------------------------------------|----------------------|-----------------------------------------|-----------------------|--------------------------|---------------------------|
| European-American | EUR040 | High                       | 3.15                                 | 0.44                 | 3                                       | 3.13                  |                          |                           |
| European-American | EUR041 | High                       | 3.79                                 | 0.16                 | 4                                       | 4.24                  |                          |                           |
| European-American | EUR042 | High                       | 6.96                                 | 0.72                 | 7                                       | 4.33                  |                          |                           |
| European-American | EUR043 | High                       | 14.66                                | 2.04                 | 15                                      | 6.04                  |                          |                           |
| European-American | EUR044 | High                       | 7.85                                 | 0.78                 | 8                                       | 1.89                  |                          |                           |
| European-American | EUR045 | High                       | 7.57                                 | 0.65                 | 8                                       | 3.48                  |                          |                           |
| European-American | EUR046 | High                       | 7.11                                 | 0.72                 | 7                                       | 2.43                  |                          |                           |
| European-American | EUR047 | High                       | 7.14                                 | 0.94                 | 7                                       | 2.74                  |                          |                           |
| European-American | EUR048 | High                       | 4.22                                 | 0.39                 | 4                                       | 1.83                  |                          |                           |
| European-American | EUR049 | High                       | 10.70                                | 0.75                 | 11                                      | 4.48                  |                          |                           |
| European-American | EUR050 | High                       | 7.01                                 | 0.55                 | 7                                       | 3.41                  |                          |                           |
|                   |        |                            | <b>Summary:</b>                      | <b>n =</b>           | <b>50</b>                               |                       |                          |                           |
|                   |        |                            |                                      | <b>Mean:</b>         | <b>6.80</b>                             |                       |                          |                           |
|                   |        |                            |                                      | <b>SD:</b>           | <b>2.43</b>                             |                       |                          |                           |
|                   |        |                            |                                      |                      |                                         |                       |                          |                           |
| Population        | Sample | Starch level<br>(high/low) | Diploid <i>AMY1</i><br>copies (qPCR) | Standard<br>Deviaion | Diploid <i>AMY1</i><br>copies (integer) | AMY1 protein<br>mg/mL | Chr1tp-6D2<br>log2 ratio | Chr1tp-30C7<br>log2 ratio |
| Hadza             | BAR10  | High                       | 10.33                                | 0.81                 | 10                                      |                       |                          |                           |
| Hadza             | BAR11  | High                       | 5.94                                 | 0.47                 | 6                                       |                       |                          |                           |
| Hadza             | BAR12  | High                       | 7.05                                 | 0.78                 | 7                                       |                       |                          |                           |
| Hadza             | BAR2   | High                       | 15.43                                | 2.89                 | 15                                      |                       |                          |                           |
| Hadza             | BAR3   | High                       | 8.43                                 | 0.31                 | 8                                       |                       |                          |                           |
| Hadza             | BAR4   | High                       | 9.90                                 | 1.10                 | 10                                      |                       |                          |                           |
| Hadza             | BAR6   | High                       | 2.64                                 | 0.48                 | 3                                       |                       |                          |                           |
| Hadza             | BAR7   | High                       | 5.06                                 | 0.81                 | 5                                       |                       |                          |                           |
| Hadza             | BAR8   | High                       | 6.46                                 | 0.54                 | 6                                       |                       |                          |                           |
| Hadza             | BAR9   | High                       | 5.48                                 | 1.23                 | 5                                       |                       |                          |                           |
| Hadza             | END 9  | High                       | 6.38                                 | 2.81                 | 6                                       |                       |                          |                           |
| Hadza             | END13  | High                       | 5.72                                 | 0.45                 | 6                                       |                       |                          |                           |
| Hadza             | END14  | High                       | 7.74                                 | 1.29                 | 8                                       |                       |                          |                           |
| Hadza             | END15  | High                       | 9.46                                 | 0.67                 | 9                                       |                       |                          |                           |
| Hadza             | END16  | High                       | 6.04                                 | 0.37                 | 6                                       |                       |                          |                           |
| Hadza             | END17  | High                       | 3.90                                 | 1.30                 | 4                                       |                       |                          |                           |
| Hadza             | END18  | High                       | 7.49                                 | 0.63                 | 7                                       |                       |                          |                           |
| Hadza             | END19  | High                       | 8.36                                 | 1.11                 | 8                                       |                       |                          |                           |
| Hadza             | END2   | High                       | 4.83                                 | 0.60                 | 5                                       |                       |                          |                           |
| Hadza             | END20  | High                       | 4.17                                 | 0.64                 | 4                                       |                       |                          |                           |
| Hadza             | END23  | High                       | 7.97                                 | 1.03                 | 8                                       |                       |                          |                           |
| Hadza             | END6   | High                       | 10.10                                | 1.40                 | 10                                      |                       |                          |                           |



**Supplementary Table 1. qPCR, protein quantification, and aCGH data for high- and low-starch population samples.**

| Hadza             | END7          | High                           | 7.71                                     | 0.70                     | 8                                           |                                  |                              |                               |
|-------------------|---------------|--------------------------------|------------------------------------------|--------------------------|---------------------------------------------|----------------------------------|------------------------------|-------------------------------|
| Hadza             | GOR11         | High                           | 11.17                                    | 1.07                     | 11                                          |                                  |                              |                               |
| Hadza             | GOR12         | High                           | 12.82                                    | 1.13                     | 13                                          |                                  |                              |                               |
| Hadza             | GOR23         | High                           | 7.20                                     | 0.69                     | 7                                           |                                  |                              |                               |
| Hadza             | GOR24         | High                           | 6.57                                     | 1.19                     | 7                                           |                                  |                              |                               |
| Hadza             | GOR27         | High                           | 8.03                                     | 1.46                     | 8                                           |                                  |                              |                               |
| Hadza             | GOR29         | High                           | 6.77                                     | 0.34                     | 7                                           |                                  |                              |                               |
| Hadza             | GOR30         | High                           | 5.66                                     | 0.98                     | 6                                           |                                  |                              |                               |
| Hadza             | GOR31         | High                           | 5.72                                     | 0.74                     | 6                                           |                                  |                              |                               |
| Hadza             | GOR32         | High                           | 4.78                                     | 0.59                     | 5                                           |                                  |                              |                               |
| Hadza             | GOR33         | High                           | 5.50                                     | 0.63                     | 5                                           |                                  |                              |                               |
| Hadza             | GOR34         | High                           | 6.09                                     | 0.86                     | 6                                           |                                  |                              |                               |
| Hadza             | GOR35         | High                           | 2.90                                     | 0.17                     | 3                                           |                                  |                              |                               |
| Hadza             | GOR37         | High                           | 4.59                                     | 0.33                     | 5                                           |                                  |                              |                               |
| Hadza             | GOR38         | High                           | 3.16                                     | 0.42                     | 3                                           |                                  |                              |                               |
| Hadza             | GOR8          | High                           | 6.74                                     | 0.29                     | 7                                           |                                  |                              |                               |
|                   |               |                                | <b>Summary:</b>                          | <b>n =</b>               | <b>38</b>                                   |                                  |                              |                               |
|                   |               |                                |                                          | <b>Mean:</b>             | <b>6.92</b>                                 |                                  |                              |                               |
|                   |               |                                |                                          | <b>SD:</b>               | <b>2.60</b>                                 |                                  |                              |                               |
|                   |               |                                |                                          |                          |                                             |                                  |                              |                               |
| <b>Population</b> | <b>Sample</b> | <b>Starch level (high/low)</b> | <b>Diploid <i>AMY1</i> copies (qPCR)</b> | <b>Standard Deviaion</b> | <b>Diploid <i>AMY1</i> copies (integer)</b> | <b><i>AMY1</i> protein mg/mL</b> | <b>Chr1tp-6D2 log2 ratio</b> | <b>Chr1tp-30C7 log2 ratio</b> |
| Japanese          | GM18940       | High                           | 8.09                                     | 0.63                     | 8                                           |                                  | 0.653                        | 0.615                         |
| Japanese          | GM18942       | High                           | 7.76                                     | 0.30                     | 8                                           |                                  | 0.878                        | 0.7315                        |
| Japanese          | GM18943       | High                           | 9.62                                     | 0.18                     | 10                                          |                                  | 0.5735                       | 0.55                          |
| Japanese          | GM18944       | High                           | 7.92                                     | 0.24                     | 8                                           |                                  | 0.911                        | 0.7585                        |
| Japanese          | GM18945       | High                           | 3.73                                     | 0.48                     | 4                                           |                                  | -0.364                       | -0.2645                       |
| Japanese          | GM18947       | High                           | 10.26                                    | 0.95                     | 10                                          |                                  | 0.7975                       | 0.73                          |
| Japanese          | GM18948       | High                           | 8.31                                     | 0.48                     | 8                                           |                                  | 0.628                        | 0.532                         |
| Japanese          | GM18949       | High                           | 7.22                                     | 0.54                     | 7                                           |                                  | 0.3705                       | 0.31                          |
| Japanese          | GM18951       | High                           | 5.34                                     | 0.27                     | 5                                           |                                  | 0.061                        | 0.089                         |
| Japanese          | GM18952       | High                           | 7.62                                     | 0.26                     | 8                                           |                                  | 0.387                        | 0.3485                        |
| Japanese          | GM18953       | High                           | 6.44                                     | 0.30                     | 6                                           |                                  | 0.4495                       | 0.329                         |
| Japanese          | GM18956       | High                           | 5.88                                     | 0.31                     | 6                                           |                                  | 0.094                        | 0.063                         |
| Japanese          | GM18959       | High                           | 4.56                                     | 0.45                     | 5                                           |                                  | 0.0885                       | 0.0625                        |
| Japanese          | GM18960       | High                           | 5.43                                     | 0.35                     | 5                                           |                                  | 0.407                        | 0.3175                        |
| Japanese          | GM18961       | High                           | 4.18                                     | 0.19                     | 4                                           |                                  | 0.1135                       | 0.0655                        |
| Japanese          | GM18964       | High                           | 7.47                                     | 0.61                     | 7                                           |                                  | 0.412                        | 0.3475                        |
| Japanese          | GM18965       | High                           | 8.56                                     | 0.38                     | 9                                           |                                  | 0.8405                       | 0.7105                        |
| Japanese          | GM18966       | High                           | 5.23                                     | 0.88                     | 5                                           |                                  | 0.111                        | 0.0925                        |

Supplementary Table 1. qPCR, protein quantification, and aCGH data for high- and low-starch population samples.

| Japanese          | GM18967       | High                           | 4.50                              | 0.31                     | 4                                    |                           | 0.1115                       | 0.074                         |
|-------------------|---------------|--------------------------------|-----------------------------------|--------------------------|--------------------------------------|---------------------------|------------------------------|-------------------------------|
| Japanese          | GM18968       | High                           | 5.86                              | 0.29                     | 6                                    |                           | 0.383                        | 0.3215                        |
| Japanese          | GM18969       | High                           | 3.07                              | 0.14                     | 3                                    |                           | -0.31                        | -0.2915                       |
| Japanese          | GM18970       | High                           | 4.48                              | 0.38                     | 4                                    |                           | 0.0835                       | 0.0905                        |
| Japanese          | GM18971       | High                           | 7.16                              | 0.22                     | 7                                    |                           | 0.325                        | 0.307                         |
| Japanese          | GM18972       | High                           | 13.73                             | 0.93                     | 14                                   |                           | 1.3685                       | 1.16                          |
| Japanese          | GM18973       | High                           | 3.72                              | 0.52                     | 4                                    |                           | 0.0255                       | 0.0385                        |
| Japanese          | GM18974       | High                           | 5.40                              | 0.70                     | 5                                    |                           | 0.3615                       | 0.3245                        |
| Japanese          | GM18975       | High                           | 8.00                              | 0.30                     | 8                                    |                           | 0.853                        | 0.7795                        |
| Japanese          | GM18976       | High                           | 5.64                              | 0.62                     | 6                                    |                           | 0.3745                       | 0.337                         |
| Japanese          | GM18978       | High                           | 5.45                              | 0.48                     | 5                                    |                           | 0.391                        | 0.358                         |
| Japanese          | GM18980       | High                           | 7.21                              | 0.47                     | 7                                    |                           | 0.613                        | 0.5175                        |
| Japanese          | GM18981       | High                           | 4.30                              | 0.57                     | 4                                    |                           | 0.042                        | 0.0255                        |
| Japanese          | GM18987       | High                           |                                   |                          |                                      |                           | 0.6455                       | 0.5455                        |
| Japanese          | GM18990       | High                           | 5.94                              | 0.33                     | 6                                    |                           | 0.348                        | 0.301                         |
| Japanese          | GM18991       | High                           | 5.85                              | 0.29                     | 6                                    |                           | 0.3915                       | 0.2915                        |
| Japanese          | GM18992       | High                           | 6.44                              | 1.30                     | 6                                    |                           | 0.4415                       | 0.317                         |
| Japanese          | GM18994       | High                           | 6.70                              | 0.43                     | 7                                    |                           | 0.6645                       | 0.543                         |
| Japanese          | GM18995       | High                           | 5.84                              | 0.52                     | 6                                    |                           | 0.6285                       | 0.561                         |
| Japanese          | GM18996       | High                           | 5.38                              | 0.87                     | 5                                    |                           |                              |                               |
| Japanese          | GM18997       | High                           | 6.70                              | 1.34                     | 7                                    |                           | 0.6555                       | 0.5235                        |
| Japanese          | GM18998       | High                           | 7.34                              | 0.66                     | 7                                    |                           | 0.636                        | 0.551                         |
| Japanese          | GM18999       | High                           | 5.08                              | 0.56                     | 5                                    |                           | 0.0155                       | 0.0075                        |
| Japanese          | GM19000       | High                           | 5.51                              | 0.52                     | 6                                    |                           | 0.3845                       | 0.302                         |
| Japanese          | GM19003       | High                           | 6.97                              | 0.83                     | 7                                    |                           | 0.4555                       | 0.3315                        |
| Japanese          | GM19005       | High                           | 9.23                              | 1.05                     | 9                                    |                           | 0.8265                       | 0.651                         |
| Japanese          | GM19007       | High                           | 6.14                              | 0.40                     | 6                                    |                           | 0.635                        | 0.5035                        |
| Japanese          | GM19012       | High                           | 8.00                              | 0.38                     | 8                                    |                           | 0.707                        | 0.561                         |
|                   |               |                                |                                   | <b>n =</b>               | <b>45</b>                            |                           |                              |                               |
|                   |               |                                | <b>Summary:</b>                   | <b>Mean:</b>             | <b>6.47</b>                          |                           |                              |                               |
|                   |               |                                |                                   | <b>SD:</b>               | <b>2.03</b>                          |                           |                              |                               |
|                   |               |                                |                                   |                          |                                      |                           |                              |                               |
|                   |               |                                |                                   |                          |                                      |                           |                              |                               |
| <b>Population</b> | <b>Sample</b> | <b>Starch level (high/low)</b> | <b>Diploid AMY1 copies (qPCR)</b> | <b>Standard Deviaion</b> | <b>Diploid AMY1 copies (integer)</b> | <b>AMY1 protein mg/mL</b> | <b>Chr1tp-6D2 log2 ratio</b> | <b>Chr1tp-30C7 log2 ratio</b> |
| Biaka             | GM10469       | Low                            | 7.63                              | 0.81                     | 8                                    |                           |                              |                               |
| Biaka             | GM10470       | Low                            | 4.04                              | 0.13                     | 4                                    |                           |                              |                               |
| Biaka             | GM10472       | Low                            | 6.11                              | 0.17                     | 6                                    |                           |                              |                               |
| Biaka             | GM10473       | Low                            | 4.11                              | 0.26                     | 4                                    |                           |                              |                               |
| Biaka             | HGDP00448     | Low                            | 12.69                             | 1.07                     | 13                                   |                           |                              |                               |
| Biaka             | HGDP00451     | Low                            | 5.14                              | 0.38                     | 5                                    |                           |                              |                               |

Supplementary Table 1. qPCR, protein quantification, and aCGH data for high- and low-starch population samples.

| Biaka      | HGDP00452 | Low                     | 3.43                       | 0.21              | 3                             |                    |                       |                        |
|------------|-----------|-------------------------|----------------------------|-------------------|-------------------------------|--------------------|-----------------------|------------------------|
| Biaka      | HGDP00453 | Low                     | 1.81                       | 0.12              | 2                             |                    |                       |                        |
| Biaka      | HGDP00454 | Low                     | 5.58                       | 0.17              | 6                             |                    |                       |                        |
| Biaka      | HGDP00455 | Low                     | 6.07                       | 0.38              | 6                             |                    |                       |                        |
| Biaka      | HGDP00457 | Low                     | 4.72                       | 0.24              | 5                             |                    |                       |                        |
| Biaka      | HGDP00458 | Low                     | 3.91                       | 0.22              | 4                             |                    |                       |                        |
| Biaka      | HGDP00459 | Low                     | 3.89                       | 0.51              | 4                             |                    |                       |                        |
| Biaka      | HGDP00460 | Low                     | 8.03                       | 0.48              | 8                             |                    |                       |                        |
| Biaka      | HGDP00461 | Low                     | 10.03                      | 0.86              | 10                            |                    |                       |                        |
| Biaka      | HGDP00464 | Low                     | 4.28                       | 0.42              | 4                             |                    |                       |                        |
| Biaka      | HGDP00465 | Low                     | 4.63                       | 0.19              | 5                             |                    |                       |                        |
| Biaka      | HGDP00466 | Low                     | 2.69                       | 0.14              | 3                             |                    |                       |                        |
| Biaka      | HGDP00469 | Low                     | 5.25                       | 0.33              | 5                             |                    |                       |                        |
| Biaka      | HGDP00470 | Low                     | 4.36                       | 0.35              | 4                             |                    |                       |                        |
| Biaka      | HGDP00473 | Low                     | 3.26                       | 0.16              | 3                             |                    |                       |                        |
| Biaka      | HGDP00475 | Low                     | 8.92                       | 1.58              | 9                             |                    |                       |                        |
| Biaka      | HGDP00477 | Low                     | 5.53                       | 0.43              | 6                             |                    |                       |                        |
| Biaka      | HGDP00479 | Low                     | 6.39                       | 0.39              | 6                             |                    |                       |                        |
| Biaka      | HGDP00981 | Low                     | 4.88                       | 0.22              | 5                             |                    |                       |                        |
| Biaka      | HGDP00985 | Low                     | 8.07                       | 0.47              | 8                             |                    |                       |                        |
| Biaka      | HGDP00986 | Low                     | 6.19                       | 0.72              | 6                             |                    |                       |                        |
| Biaka      | HGDP01084 | Low                     | 6.88                       | 0.68              | 7                             |                    |                       |                        |
| Biaka      | HGDP01085 | Low                     | 4.10                       | 0.33              | 4                             |                    |                       |                        |
| Biaka      | HGDP01086 | Low                     | 6.14                       | 0.32              | 5                             |                    |                       |                        |
| Biaka      | HGDP01088 | Low                     | 7.15                       | 0.52              | 7                             |                    |                       |                        |
| Biaka      | HGDP01089 | Low                     | 2.94                       | 0.13              | 3                             |                    |                       |                        |
| Biaka      | HGDP01090 | Low                     | 5.94                       | 0.36              | 6                             |                    |                       |                        |
| Biaka      | HGDP01091 | Low                     | 4.25                       | 0.28              | 4                             |                    |                       |                        |
| Biaka      | HGDP01093 | Low                     | 3.55                       | 0.35              | 4                             |                    |                       |                        |
| Biaka      | HGDP01094 | Low                     | 5.09                       | 0.25              | 5                             |                    |                       |                        |
|            |           |                         | Summary:                   | n =               | 36                            |                    |                       |                        |
|            |           |                         |                            | Mean:             | 5.47                          |                    |                       |                        |
|            |           |                         |                            | SD:               | 2.22                          |                    |                       |                        |
|            |           |                         |                            |                   |                               |                    |                       |                        |
| Population | Sample    | Starch level (high/low) | Diploid AMY1 copies (qPCR) | Standard Deviaion | Diploid AMY1 copies (integer) | AMY1 protein mg/mL | Chr1tp-6D2 log2 ratio | Chr1tp-30C7 log2 ratio |
| Mbuti      | HGDP00449 | Low                     | 4.69                       | 0.51              | 5                             |                    |                       |                        |
| Mbuti      | HGDP00450 | Low                     | 4.82                       | 0.20              | 5                             |                    |                       |                        |
| Mbuti      | HGDP00456 | Low                     | 6.77                       | 0.34              | 7                             |                    |                       |                        |
| Mbuti      | HGDP00462 | Low                     | 8.66                       | 0.59              | 9                             |                    |                       |                        |

Supplementary Table 1. qPCR, protein quantification, and aCGH data for high- and low-starch population samples.

| Mbuti             | HGDP00463     | Low                            | 5.35                                     | 0.34                     | 5                                           |                           |                              |                               |
|-------------------|---------------|--------------------------------|------------------------------------------|--------------------------|---------------------------------------------|---------------------------|------------------------------|-------------------------------|
| Mbuti             | HGDP00467     | Low                            | 4.48                                     | 0.18                     | 4                                           |                           |                              |                               |
| Mbuti             | HGDP00468     | Low                            | 6.79                                     | 0.46                     | 7                                           |                           |                              |                               |
| Mbuti             | HGDP00471     | Low                            | 6.90                                     | 0.60                     | 7                                           |                           |                              |                               |
| Mbuti             | HGDP00474     | Low                            | 3.79                                     | 0.44                     | 4                                           |                           |                              |                               |
| Mbuti             | HGDP00476     | Low                            | 5.37                                     | 0.23                     | 5                                           |                           |                              |                               |
| Mbuti             | HGDP00478     | Low                            | 3.58                                     | 0.23                     | 4                                           |                           |                              |                               |
| Mbuti             | HGDP00982     | Low                            | 3.78                                     | 0.48                     | 4                                           |                           |                              |                               |
| Mbuti             | HGDP00983     | Low                            | 5.10                                     | 0.58                     | 5                                           |                           |                              |                               |
| Mbuti             | HGDP00984     | Low                            | 4.50                                     | 0.12                     | 5                                           |                           |                              |                               |
| Mbuti             | HGDP01081     | Low                            | 4.10                                     | 0.38                     | 4                                           |                           |                              |                               |
|                   |               |                                | <b>Summary:</b>                          | <b>n =</b>               | <b>15</b>                                   |                           |                              |                               |
|                   |               |                                |                                          | <b>Mean:</b>             | <b>5.33</b>                                 |                           |                              |                               |
|                   |               |                                |                                          | <b>SD:</b>               | <b>1.50</b>                                 |                           |                              |                               |
|                   |               |                                |                                          |                          |                                             |                           |                              |                               |
| <b>Population</b> | <b>Sample</b> | <b>Starch level (high/low)</b> | <b>Diploid <i>AMY1</i> copies (qPCR)</b> | <b>Standard Deviaion</b> | <b>Diploid <i>AMY1</i> copies (integer)</b> | <b>AMY1 protein mg/mL</b> | <b>Chr1tp-6D2 log2 ratio</b> | <b>Chr1tp-30C7 log2 ratio</b> |
| Yakut             | HGDP00945     | Low                            | 3.97                                     | 0.32                     | 4                                           |                           | -0.03                        | 0.0485                        |
| Yakut             | HGDP00946     | Low                            | 5.26                                     | 0.43                     | 5                                           |                           | 0.5995                       | 0.4565                        |
| Yakut             | HGDP00947     | Low                            | 3.43                                     | 0.15                     | 3                                           |                           | -0.0345                      | -0.052                        |
| Yakut             | HGDP00948     | Low                            | 3.55                                     | 0.18                     | 4                                           |                           | -0.216                       | -0.2445                       |
| Yakut             | HGDP00949     | Low                            | 9.33                                     | 0.59                     | 9                                           |                           | 0.7935                       | 0.668                         |
| Yakut             | HGDP00950     | Low                            | 2.80                                     | 0.21                     | 3                                           |                           | -0.427                       | -0.309                        |
| Yakut             | HGDP00951     | Low                            | 8.17                                     | 1.20                     | 8                                           |                           | 0.7475                       | 0.6135                        |
| Yakut             | HGDP00952     | Low                            | 3.75                                     | 0.42                     | 4                                           |                           | 0.046                        | 0.0455                        |
| Yakut             | HGDP00953     | Low                            | 3.56                                     | 0.46                     | 4                                           |                           | -0.465                       | -0.381                        |
| Yakut             | HGDP00954     | Low                            | 4.55                                     | 0.86                     | 5                                           |                           | -0.0305                      | -0.055                        |
| Yakut             | HGDP00955     | Low                            | 4.69                                     | 0.81                     | 5                                           |                           | 0.3195                       | 0.2425                        |
| Yakut             | HGDP00956     | Low                            | 3.95                                     | 0.37                     | 4                                           |                           | -0.0865                      | -0.102                        |
| Yakut             | HGDP00957     | Low                            | 4.84                                     | 0.58                     | 5                                           |                           | 0.0215                       | 0.0135                        |
| Yakut             | HGDP00958     | Low                            | 9.02                                     | 0.68                     | 9                                           |                           | 0.5405                       | 0.402                         |
| Yakut             | HGDP00959     | Low                            | 10.30                                    | 1.24                     | 10                                          |                           | 1.167                        | 0.991                         |
| Yakut             | HGDP00960     | Low                            | 3.88                                     | 0.21                     | 4                                           |                           | -0.493                       | -0.3515                       |
| Yakut             | HGDP00961     | Low                            | 4.29                                     | 0.73                     | 4                                           |                           | -0.429                       | -0.358                        |
| Yakut             | HGDP00962     | Low                            | 3.91                                     | 0.69                     | 4                                           |                           | -0.0085                      | -0.0055                       |
| Yakut             | HGDP00963     | Low                            | 4.71                                     | 0.35                     | 5                                           |                           | 0.058                        | 0.092                         |
| Yakut             | HGDP00964     | Low                            | 3.59                                     | 0.25                     | 4                                           |                           | -0.508                       | -0.392                        |
| Yakut             | HGDP00965     | Low                            | 3.66                                     | 0.64                     | 4                                           |                           | -0.458                       | -0.388                        |
| Yakut             | HGDP00966     | Low                            | 8.29                                     | 1.17                     | 8                                           |                           | 0.522                        | 0.413                         |
| Yakut             | HGDP00967     | Low                            | 4.70                                     | 0.45                     | 5                                           |                           | 0.0005                       | 0.0445                        |

**Supplementary Table 1. qPCR, protein quantification, and aCGH data for high- and low-starch population samples.**

| Yakut             | HGDP00968     | Low                            | 5.69                                     | 0.48                     | 6                                           |                           | 0.2475                       | 0.196                         |
|-------------------|---------------|--------------------------------|------------------------------------------|--------------------------|---------------------------------------------|---------------------------|------------------------------|-------------------------------|
| Yakut             | HGDP00969     | Low                            | 5.12                                     | 0.27                     | 5                                           |                           | -0.09                        | -0.0885                       |
|                   |               |                                | <b>Summary:</b>                          | <b>n =</b>               | <b>25</b>                                   |                           |                              |                               |
|                   |               |                                |                                          | <b>Mean:</b>             | <b>5.24</b>                                 |                           |                              |                               |
|                   |               |                                |                                          | <b>SD:</b>               | <b>1.96</b>                                 |                           |                              |                               |
|                   |               |                                |                                          |                          |                                             |                           |                              |                               |
| <b>Population</b> | <b>Sample</b> | <b>Starch level (high/low)</b> | <b>Diploid <i>AMY1</i> copies (qPCR)</b> | <b>Standard Deviaion</b> | <b>Diploid <i>AMY1</i> copies (integer)</b> | <b>AMY1 protein mg/mL</b> | <b>Chr1tp-6D2 log2 ratio</b> | <b>Chr1tp-30C7 log2 ratio</b> |
| Datog             | GOR20         | Low                            | 2.40                                     | 0.30                     | 2                                           |                           |                              |                               |
| Datog             | GOR49         | Low                            | 10.21                                    | 0.69                     | 10                                          |                           |                              |                               |
| Datog             | GOR51         | Low                            | 6.20                                     | 0.50                     | 6                                           |                           |                              |                               |
| Datog             | GOR52         | Low                            | 4.69                                     | 0.54                     | 5                                           |                           |                              |                               |
| Datog             | GOR53         | Low                            | 4.59                                     | 0.24                     | 5                                           |                           |                              |                               |
| Datog             | GOR54         | Low                            | 2.72                                     | 0.41                     | 3                                           |                           |                              |                               |
| Datog             | GOR55         | Low                            | 4.81                                     | 0.33                     | 5                                           |                           |                              |                               |
| Datog             | GOR56         | Low                            | 6.08                                     | 1.01                     | 6                                           |                           |                              |                               |
| Datog             | GOR57         | Low                            | 3.49                                     | 0.61                     | 3                                           |                           |                              |                               |
| Datog             | GOR59         | Low                            | 4.71                                     | 0.53                     | 5                                           |                           |                              |                               |
| Datog             | GOR6          | Low                            | 8.00                                     | 0.80                     | 8                                           |                           |                              |                               |
| Datog             | GOR62         | Low                            | 4.25                                     | 0.97                     | 4                                           |                           |                              |                               |
| Datog             | GOR63         | Low                            | 4.68                                     | 0.31                     | 5                                           |                           |                              |                               |
| Datog             | GOR64         | Low                            | 7.64                                     | 0.92                     | 8                                           |                           |                              |                               |
| Datog             | GOR67         | Low                            | 9.53                                     | 0.43                     | 10                                          |                           |                              |                               |
| Datog             | GOR71         | Low                            | 7.17                                     | 0.60                     | 7                                           |                           |                              |                               |
| Datog             | GOR72         | Low                            | 6.19                                     | 0.55                     | 6                                           |                           |                              |                               |
|                   |               |                                | <b>Summary:</b>                          | <b>n =</b>               | <b>17</b>                                   |                           |                              |                               |
|                   |               |                                |                                          | <b>Mean:</b>             | <b>5.76</b>                                 |                           |                              |                               |
|                   |               |                                |                                          | <b>SD:</b>               | <b>2.28</b>                                 |                           |                              |                               |

**Supplementary Table 2.** Subsistence classification, dietary description, and traditional starch intake of sampled populations.

| <b>Region/Population</b>             | <b>Subsistence</b>     | <b>General Dietary Description</b>                                                                                                                        | <b>Traditional Starch Intake</b>                                                                                               |
|--------------------------------------|------------------------|-----------------------------------------------------------------------------------------------------------------------------------------------------------|--------------------------------------------------------------------------------------------------------------------------------|
| <b>Central and East Africa</b>       |                        |                                                                                                                                                           |                                                                                                                                |
| Datog <sup>1,2</sup>                 | Pastoralism            | Meat, blood and dairy products from cattle, sheep, and goats; (cultivated foods acquired through trade, such as maize <sup>a</sup> )                      | Low, low-moderate <sup>b</sup>                                                                                                 |
| Hadza <sup>3,4</sup>                 | Hunter-gathering       | Meat; tubers; baobab seeds; some high-carbohydrate products, such as fruit and honey; (cultivated foods acquired through trade, such as maize and millet) | High; tubers presently represent ca. 40% of daily Kcal for women; the starch content of tubers ranges from 20.0 – 26.0 g/100 g |
| Mbuti <sup>5</sup>                   | Hunter-gathering       | Meat; seeds; honey; (cultivated foods acquired through trade, such as cassava, plantains, yams, and sweet potatoes <sup>a</sup> )                         | Low                                                                                                                            |
| Biaka <sup>6</sup>                   | Hunter-gathering       | Meat and protein from caterpillars; fruit; seeds; honey; (cultivated foods acquired through trade, such as cassava <sup>a</sup> )                         | Low                                                                                                                            |
| <b>Asia</b>                          |                        |                                                                                                                                                           |                                                                                                                                |
| Japanese <sup>7</sup>                | Industrial agriculture | High-carbohydrate products, such as rice; meat, fish; fats and oils; fruit, vegetables                                                                    | High; ca. 140 g day <sup>-1</sup>                                                                                              |
| Yakut <sup>8,9</sup>                 | Pastoralism/Fishing    | Meat and dairy products from fishing, hunting, and nomadic herding <sup>a</sup>                                                                           | Low                                                                                                                            |
| <b>Europe</b>                        |                        |                                                                                                                                                           |                                                                                                                                |
| European-American <sup>7,10,11</sup> | Industrial agriculture | High-carbohydrate products, such as cereal grains; meat, poultry; dairy products; fats and oils; fruit, vegetables                                        | High; consumption in Europe = ca. 99-220 g day <sup>-1</sup> ; consumption in the U.S.A. = ca. 73-112 g day <sup>-1</sup>      |

<sup>a</sup>The starch intake of traditional low-starch populations has increased substantially in the past century due to the ingestion of cultivated foods obtained from trade with small-scale agricultural settlements.

<sup>b</sup>The Datog now store some of the maize and grain that they acquire in trade, and therefore appear to have the highest levels of starch consumption of the low-starch populations in our study. It is unclear how long this practice has continued, though it is likely that traditional levels of starch consumption were considerably lower.

**Supplementary Table 2.** Subsistence classification, dietary description, and traditional starch intake of sampled populations.

**References**

1. Sieff, D.E. Herding strategies of the Datoga pastoralists of Tanzania: Is household labor a limiting factor? *Hum. Ecol.* **25**, 519-544 (1997).
2. Sellen, D.W. Nutritional consequences of wealth differentials in East African pastoralists: The case of the Datoga of Northern Tanzania. *Hum. Ecol.* **31**, 529-570 (2003).
3. Marlowe, F.W. A critical period for provisioning by Hadza men: Implications for pair bonding. *Evol. Hum. Behav.* **24**, 217-229 (2003).
4. Schoeninger, M.J., Bunn, H.T., Murray, S.S. & Marlett, J.A. Composition of tubers used by Hadza foragers of Tanzania. *J. Food Comp. Anal.* **14**, 15-25 (2001).
5. Hart, T.B. & Hart, J.A. The ecological basis of hunter-gatherer subsistence in African rain forests: The Mbuti of eastern Zaire. *Hum. Ecol.* **14**, 29-55 (1986).
6. Bahuchet, S. Food Supply Uncertainty among the Aka Pygmies. in *Coping with Uncertainty in Food Supply* (eds. de Garine, I. & Harrison, G.A.) 118-149 (Clarendon Press, Oxford, 1988).
7. Cassidy, A., Bingham, S.A. & Cummings, J.H. Starch intake and colorectal cancer risk: An international comparison. *Br. J. Cancer* **69**, 937-942 (1994).
8. Tokarev, S.A. & Gurvich, I.S. The Yakuts. in *Peoples of Siberia* (eds. Levin, M.G. & Potapov, L.P.) 243-304 (University of Chicago Press, Chicago, 1956).
9. Sorensen, M.V., Snodgrass, J.J., Leonard, W.R., Tarskaia, A., Ivanov, K.I., Krivoshapkin, V.G. & Spitsyn, V.A. Health consequences of postsocialist transition: Dietary and lifestyle determinants of plasma lipids in Yakutia. *Amer. J. Hum. Biol.* **17**, 576-592 (2002).
10. Page, L. & Friend, B. The changing United States diet. *BioScience* **28**, 192-197 (1978).
11. Block, G., Dresser, C.M., Hartman, A.M. & Carroll, M.D. Nutrient sources in the American diet: Quantitative data from the NHANES II survey: II. Macronutrients and fats. *Am. J. Epidemiol.* **122**, 27-40 (1985).

Supplementary Table 3. PCR primers and conditions.

| Primer Description                                     | Name <sup>1</sup> | 5' Sequence 3'              | Primer used for:      |       |       |                    |       |       |                   |       |       |                   |                   |      |            |
|--------------------------------------------------------|-------------------|-----------------------------|-----------------------|-------|-------|--------------------|-------|-------|-------------------|-------|-------|-------------------|-------------------|------|------------|
|                                                        |                   |                             | <i>P. troglodytes</i> |       |       | <i>P. paniscus</i> |       |       | <i>G. gorilla</i> |       |       | <i>C.</i>         | <i>L.</i>         | qPCR | Fiber FISH |
|                                                        |                   |                             | AMY1                  | AMY2A | AMY2B | AMY1               | AMY2A | AMY2B | AMY1              | AMY2A | AMY2B | <i>angolensis</i> | <i>lagotricha</i> |      |            |
| <b>qPCR primers</b>                                    |                   |                             |                       |       |       |                    |       |       |                   |       |       |                   |                   |      |            |
| AMY1-specific                                          | AMY1 qF           | GGAAGAATATAGATGCCAACCC      |                       |       |       |                    |       |       |                   |       |       |                   |                   |      | x          |
|                                                        | AMY1 qR           | TCAGCTGAAGTGGATCATTGT       |                       |       |       |                    |       |       |                   |       |       |                   |                   |      |            |
| TP53 (reference/calibrator)                            | TP53 F            | CCCTTCCAGAAAACCTACC         |                       |       |       |                    |       |       |                   |       |       |                   |                   |      | x          |
|                                                        | TP53 R            | CAGGCATTGAAGTCTCATGG        |                       |       |       |                    |       |       |                   |       |       |                   |                   |      |            |
| <b>Long Range Amplification Primers<sup>2</sup></b>    |                   |                             |                       |       |       |                    |       |       |                   |       |       |                   |                   |      |            |
| long range amplification - AMY1                        | AMY1 F            | CCTAGCCTGTTTTGCAATTTTCTCT   | x                     |       |       |                    | x     |       |                   |       | x     |                   |                   |      |            |
|                                                        | AMY1 R            | TAAAAATTTGGCTTTCCTTCCCTTGTA |                       |       |       |                    |       |       |                   |       |       |                   |                   |      | x          |
| long range amplification - AMY2A                       | AMY2A F           | GCTGCATGTCTTTGGTTGTACTTCT   |                       | x     |       |                    |       | x     |                   |       |       | x                 |                   |      |            |
|                                                        | AMY2A R           | CGTTGCCTATGGAAAAAGGAATGTTT  |                       |       |       |                    |       |       |                   |       |       |                   |                   |      |            |
| long range amplification - AMY2B                       | AMY2B F           | ATCACACCTTCTACAAGGGACTGCAC  |                       |       |       |                    |       |       |                   |       |       |                   |                   |      |            |
|                                                        | AMY2B R           | TGGGAAGAAAACCCAGACTACAAGGT  |                       |       |       | x                  |       |       | x                 |       |       |                   | x                 |      |            |
| long range amplification - colobus                     | AMY <i>Can</i> F  | ATGAAGATCAAGATGATCGCACCC    |                       |       |       |                    |       |       |                   |       |       |                   |                   | x    |            |
|                                                        | AMY <i>Can</i> R  | TAAAAAGCATAACAACCGGGCTAACTT |                       |       |       |                    |       |       |                   |       |       |                   |                   |      |            |
| long range amplification - upstream                    | AMYup F           | TAAGCCTTGGGAAAGAAGTTGTCC    |                       |       |       |                    |       |       |                   |       |       |                   |                   |      |            |
|                                                        | AMYup R           | GCCCTTCCAGCCTCTAGATAAAT     |                       |       |       |                    |       |       |                   |       |       |                   |                   |      | x          |
| <b>Nested PCR Re-Amplification Primers<sup>3</sup></b> |                   |                             |                       |       |       |                    |       |       |                   |       |       |                   |                   |      |            |
| re-amplification - gene region 1                       | -674 F            | CTTGGTCACTTCATGGCTAAA       |                       |       |       |                    |       |       |                   |       |       |                   |                   |      |            |
|                                                        | 1961 R            | GGGGATGCTCACATTCTACTA       | x                     | x     | x     | x                  | x     | x     | x                 | x     | x     | x                 | x                 |      | x          |
| re-amplification - gene region 1                       | 133 F             | TGATATTGCTCTTGAATGTGAGC     |                       |       |       |                    |       |       |                   |       |       |                   |                   | x    |            |
|                                                        | 1845 R            | GTGGGCAAATGTATATTGATTA      |                       |       |       |                    |       |       |                   |       |       |                   |                   |      |            |
| re-amplification - gene region 2                       | 1789 F            | GGACAGAGTTAACAAGTTTGAC      |                       |       |       |                    |       |       |                   |       |       |                   |                   |      |            |
|                                                        | 4022 R            | CTTCTCCCAGTTCCTATTTTT       | x                     | x     |       |                    | x     |       |                   |       | x     |                   | x                 |      | x          |
| re-amplification - gene region 2                       | 1580 F            | AAGTAGGGACTTCCAGCAGTC       |                       |       |       |                    |       |       |                   |       |       |                   |                   |      |            |
|                                                        | 4022 R            | CTTCTCCCAGTTCCTATTTTT       |                       |       |       | x                  |       | x     | x                 |       |       | x                 |                   |      |            |
| re-amplification - gene region 3                       | 3691 F            | ATCCTTCTGGAGTGCCTCTAA       |                       |       |       |                    |       |       |                   |       |       |                   |                   |      |            |
|                                                        | 6083 R            | TTATCCTCTCCTTTCATTCCA       | x                     | x     | x     | x                  | x     | x     | x                 | x     | x     | x                 | x                 | x    | x          |
| re-amplification - gene region 4                       | 5871 F            | GACCTGAGGAGTTCAAGACCTA      |                       |       |       |                    |       |       |                   |       |       |                   |                   |      |            |
|                                                        | 8214 R            | AACACACTTAGCTATTGCTTTGC     | x                     | x     |       |                    | x     |       |                   |       | x     |                   |                   |      | x          |
| re-amplification - gene region 4                       | 5647 F            | CAAATGAGGAAACTGAGACACAGA    |                       |       |       |                    |       |       |                   |       |       |                   |                   |      |            |
|                                                        | 8223 R            | AAGAAAAGAAACACACTTGGCTA     |                       |       |       | x                  |       |       | x                 | x     |       |                   | x                 |      |            |
| re-amplification - gene region 4                       | 5939 F            | AAATAAAAAGTAGCTGCCTGTGG     |                       |       |       |                    |       |       |                   |       |       |                   |                   |      |            |
|                                                        | 7977 R            | GACCAGTTTGCAAAAGTTAAAGAA    |                       |       |       |                    |       |       |                   |       |       |                   |                   | x    |            |
| re-amplification - upstream region 1                   | Up F1             | CCTTTTAAGGGCTCACAACAC       |                       |       |       |                    |       |       |                   |       |       |                   |                   |      |            |
|                                                        | Up R1             | TTTTTCTCCAGGTGACATTGTG      |                       |       |       |                    |       |       |                   |       |       |                   |                   |      | x          |
| re-amplification - upstream region 2                   | Up F2             | CACAATGTCACCTGGAGAAAAA      |                       |       |       |                    |       |       |                   |       |       |                   |                   |      |            |
|                                                        | Up R2             | GTTAAGAGCCACCATTTCTTG       |                       |       |       |                    |       |       |                   |       |       |                   |                   |      | x          |
| re-amplification - upstream region 3                   | Up F3             | TCGATAGTCTTTGGTCCTTGGT      |                       |       |       |                    |       |       |                   |       |       |                   |                   |      |            |
|                                                        | Up R3             | TCTTTAGTCTGTGTGCCCTTA       |                       |       |       |                    |       |       |                   |       |       |                   |                   |      | x          |
| <b>Sequencing Primers</b>                              |                   |                             |                       |       |       |                    |       |       |                   |       |       |                   |                   |      |            |
| Sequencing - gene region 1                             | 114 R             | CGCTCACATTCAAGAGCAATA       |                       |       |       |                    |       |       |                   |       |       |                   |                   | x    |            |
| Sequencing - gene region 1                             | 376 R             | CTTGAAAATATTAACAGCACACA     | x                     | x     | x     | x                  | x     | x     | x                 | x     | x     | x                 |                   |      |            |
| Sequencing - gene region 1                             | 527 F             | TTGTAGGTCTCTCCACCAAA        |                       |       |       |                    |       |       |                   |       |       |                   |                   | x    |            |
| Sequencing - gene region 1                             | 556 R             | GGTATCTTCCCACCAAGGTCT       |                       |       |       | x                  |       |       |                   |       |       |                   |                   |      |            |
| Sequencing - gene region 1                             | 562 R             | TGGTTGGTATCTTCCCACCA        |                       |       |       |                    |       |       |                   |       |       |                   |                   | x    |            |
| Sequencing - gene region 1                             | 751 F             | TTTGGAGCGAAAAGTTTCCA        |                       |       |       |                    |       |       |                   |       |       |                   | x                 | x    |            |
| Sequencing - gene region 1                             | 955 R             | AGCAAATATTGTAAGTGAATTA      | x                     | x     | x     | x                  | x     | x     | x                 | x     | x     | x                 | x                 | x    |            |
| Sequencing - gene region 1                             | 1483 F            | GGTTCGTATTATGTGGATGC        |                       |       |       |                    |       |       |                   |       |       |                   |                   | x    |            |



Supplementary Table 3. PCR primers and conditions.

| Primer Description         | Name <sup>1</sup> | 5' Sequence 3'          | Primer used for:      |              |              |                    |              |              |                   |              |              |                   |                   |      |            |  |
|----------------------------|-------------------|-------------------------|-----------------------|--------------|--------------|--------------------|--------------|--------------|-------------------|--------------|--------------|-------------------|-------------------|------|------------|--|
|                            |                   |                         | <i>P. troglodytes</i> |              |              | <i>P. paniscus</i> |              |              | <i>G. gorilla</i> |              |              | <i>C.</i>         | <i>L.</i>         | qPCR | Fiber FISH |  |
|                            |                   |                         | <i>AMY1</i>           | <i>AMY2A</i> | <i>AMY2B</i> | <i>AMY1</i>        | <i>AMY2A</i> | <i>AMY2B</i> | <i>AMY1</i>       | <i>AMY2A</i> | <i>AMY2B</i> | <i>angolensis</i> | <i>lagotricha</i> |      |            |  |
| Sequencing - gene region 1 | 1612 R            | TCTCCACTTCCAGTTTACATT   | x                     | x            | x            | x                  | x            | x            | x                 | x            | x            | x                 | x                 | x    |            |  |
| Sequencing - gene region 2 | 2183 F            | TGTGCGTTCCAAGATTGCCGA   |                       |              |              |                    |              |              |                   |              |              |                   |                   |      | x          |  |
| Sequencing - gene region 2 | 2210 F            | ATCTCATTGACATTGGTGTG    |                       |              |              |                    |              |              |                   |              |              | x                 | x                 | x    |            |  |
| Sequencing - gene region 2 | 2318 R            | TCCTGGTAAATGAAAGGTTTAC  |                       |              |              |                    |              |              |                   |              |              | x                 | x                 | x    |            |  |
| Sequencing - gene region 2 | 2509 F            | ATATCTAATTCTTTATCACA    | x                     | x            | x            | x                  | x            | x            | x                 | x            | x            | x                 | x                 |      |            |  |
| Sequencing - gene region 2 | 3208 F            | ATGGAGAGAAGATGTCTTAC    | x                     | x            | x            | x                  | x            | x            | x                 | x            | x            | x                 | x                 |      |            |  |
| Sequencing - gene region 2 | 3357 R            | ACAAAAGATGATTGATTAGAG   |                       |              |              |                    |              |              |                   | x            | x            |                   |                   |      |            |  |
| Sequencing - gene region 3 | 3936 F            | AGAAAAGATTTAATCTTCAG    | x                     | x            | x            | x                  | x            | x            | x                 | x            | x            |                   |                   |      |            |  |
| Sequencing - gene region 2 | 3979 R            | TCTTGAGACAGACTCTAAA     |                       |              |              |                    |              |              |                   |              |              |                   |                   |      | x          |  |
| Sequencing - gene region 3 | 4248 R            | TCCAAGTCCATTTTGTACAG    |                       |              |              | x                  |              |              |                   |              |              |                   |                   |      |            |  |
| Sequencing - gene region 3 | 4284 F            | TTGGATTTATGCTTGCTCATC   |                       |              |              |                    |              |              |                   |              |              |                   |                   |      | x          |  |
| Sequencing - gene region 3 | 4323 F            | AATGTCAAGCTACCGTTGGC    | x                     | x            | x            | x                  | x            | x            | x                 | x            | x            | x                 | x                 |      |            |  |
| Sequencing - gene region 3 | 4419 R            | AATAAATAAATACTTAATAGTTG |                       |              |              | x                  |              |              |                   |              |              |                   |                   |      |            |  |
| Sequencing - gene region 3 | 4465 R            | AAAATCAGAGCCCTGTATCAGG  |                       |              |              |                    |              |              |                   |              |              |                   | x                 |      |            |  |
| Sequencing - gene region 3 | 4488 R            | CTTTAATAAACCTGCATTAC    | x                     | x            | x            |                    | x            | x            | x                 | x            | x            |                   |                   | x    |            |  |
| Sequencing - gene region 3 | 4795 R            | TAAGTCAAGCTACCGTTGGC    |                       |              |              | x                  |              |              |                   |              |              |                   |                   |      | x          |  |
| Sequencing - gene region 3 | 5005 F            | TATTTGGAAAGCTAGTAGAAG   | x                     | x            | x            | x                  | x            | x            | x                 | x            | x            | x                 | x                 |      |            |  |
| Sequencing - gene region 3 | 5089 R            | AAAAAGCTAGCTAGATATCTG   |                       |              |              | x                  | x            |              | x                 |              |              | x                 |                   |      |            |  |
| Sequencing - gene region 3 | 5120 R            | GTAGTGGACTTCTCAAAGTAA   |                       |              |              |                    |              |              |                   |              |              |                   |                   |      | x          |  |
| Sequencing - gene region 3 | 5228 F            | GACAACCTTCTATAATTCTAC   |                       |              |              | x                  |              |              |                   |              |              |                   |                   |      |            |  |
| Sequencing - gene region 3 | 5380 R            | AGTAACCCTAGGAAGTTTATC   |                       |              |              | x                  |              |              |                   |              |              |                   |                   |      |            |  |
| Sequencing - gene region 3 | 5584 F            | AAGGCATTTTCACATATATTAC  |                       |              |              |                    |              |              |                   | x            |              |                   |                   |      |            |  |
| Sequencing - gene region 3 | 5868 R            | TGCTAGCTTGCCAGATAGG     |                       |              |              | x                  |              |              |                   | x            |              |                   |                   |      |            |  |
| Sequencing - gene region 3 | 5940 R            | GGAAGTGTGGTGTGACACAA    |                       |              |              |                    |              |              |                   |              |              |                   |                   |      | x          |  |
| Sequencing - gene region 4 | 6453 F            | TGGCGCAAATAAGGTGAGAAT   | x                     |              |              |                    |              |              |                   |              |              |                   |                   | x    |            |  |
| Sequencing - gene region 4 | 6619 R            | CAAAAGCCACTTGGTTGCTC    | x                     | x            | x            | x                  | x            | x            | x                 | x            | x            | x                 | x                 | x    |            |  |
| Sequencing - gene region 4 | 7158 F            | TCTCTGTCTCCTTGTGACAAA   | x                     | x            | x            | x                  | x            | x            | x                 | x            | x            | x                 | x                 | x    |            |  |
| Sequencing - gene region 4 | 7246 R            | CAGATGAAAGGCCAATAATGAG  | x                     | x            | x            | x                  | x            | x            | x                 | x            | x            | x                 | x                 | x    |            |  |
| Sequencing - gene region 4 | 7847 F            | GTTACTTTTGGTCTTAGAAAAG  | x                     |              |              | x                  |              |              |                   | x            |              |                   |                   |      |            |  |
| Sequencing - gene region 4 | 7918 R            | TAAACAGCATAACTTTATG     | x                     |              |              | x                  |              |              |                   | x            |              |                   |                   |      |            |  |
| Sequencing - gene region 4 | 7921 F            | CTGCCTAGAGTCTGCAGCATC   |                       |              |              |                    |              |              |                   |              |              |                   |                   |      | x          |  |

<sup>1</sup>Numbers correspond to primer position with respect to the "A" of start codon ATG in *AMY1* from the human hg18 reference sequence

<sup>2</sup>For long range amplification we used TripleMaster Taq (Eppendorf) with the Tuning Buffer and the following PCR conditions: 93° for 3 min, 40x of (93° for 15 sec, 64° for 30 sec, 68° for 14 min)

<sup>3</sup>For nested PCR amplification we used HotMaster Taq (Eppendorf) with these conditions: 93° for 3 min, 35x of (93° for 30 sec, 59° for 30 sec, 70° for 4 min)

Nested PCRs were performed in 50 ul reactions using 5 ul of a 1:100 dilution (PCR product: H2O) of the unpurified long-range PCR product
